# Supplementary material
Source: Royal Society of Chemistry journal article supplement (doi:10.1039/d6mh00226a)
Supplement: d6mh00226a1.pdf [file d6mh00226a1.pdf]

## SUPPORTING INFORMATION

### **Enabling Gradient Biomineralization and Prestress with a Macroscopic Matrix: The Fish Swim Bladder for Bioprocessing-Inspired Fabrication**

Bingyu Xue<sup>a,b</sup>, Junming Wu<sup>b</sup>, Jiangyu Yi<sup>b</sup>, Jing Li<sup>a</sup>, Ziyi Guo<sup>a</sup>, Guohai Huang<sup>a</sup>, and  
Kun Wang\*<sup>a,b</sup>, Hang Ping\*<sup>a,c</sup>, Zhengyi Fu\*<sup>a,c</sup>

*a. Hubei Longzhong Laboratory, Xiangyang, Hubei, P. R. China*

*b. School of Materials Science and Engineering, Wuhan University of Technology,  
Wuhan, Hubei, P. R. China*

*c. State Key Laboratory of Advanced Technology for Materials Synthesis and  
Processing, Wuhan University of Technology, Wuhan, Hubei, P. R. China*

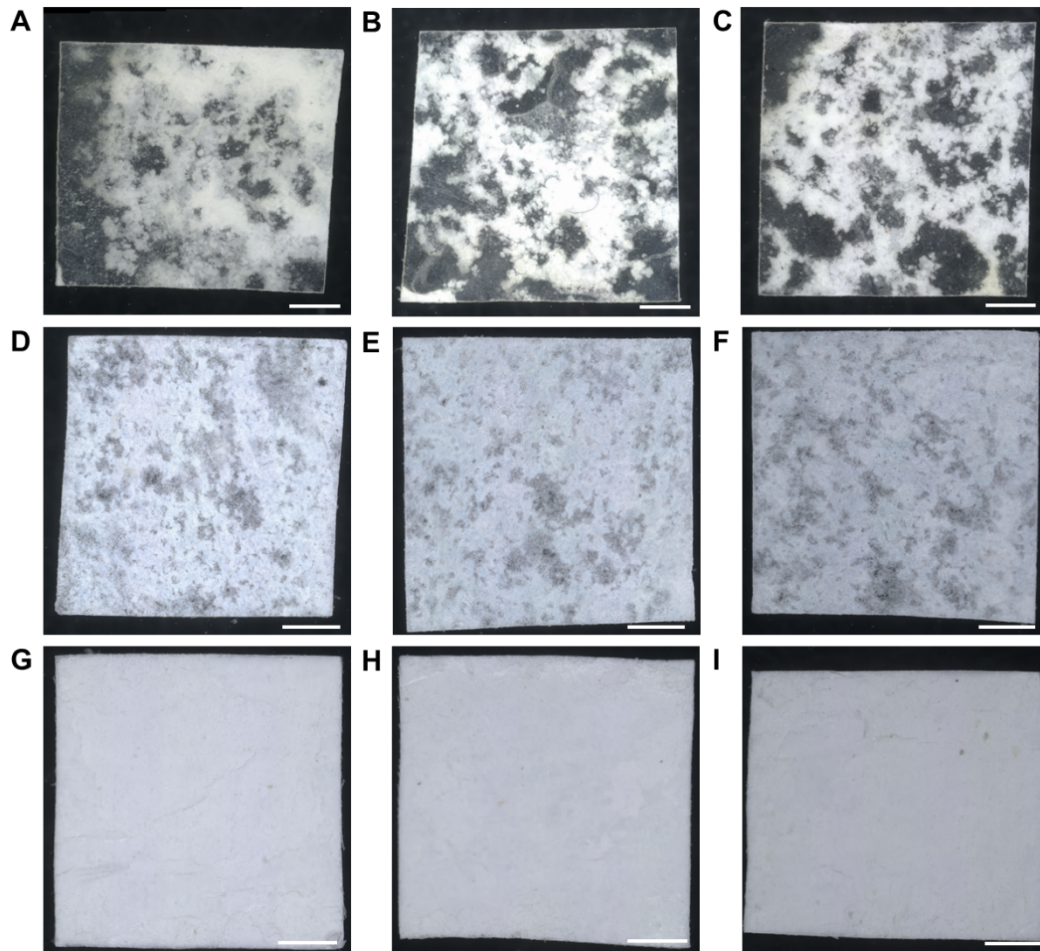

**Figure S1.** FSB mineralized for 3 days, 5 days, and 7 days, 3 replicates of FSB were mineralized in each experimental group. (A-C) 3 days. (D-F) 5 days. (G-I) 7 days. Scale bar: 1 mm. The relationship between the mineralization coverage rate and time was obtained from this.

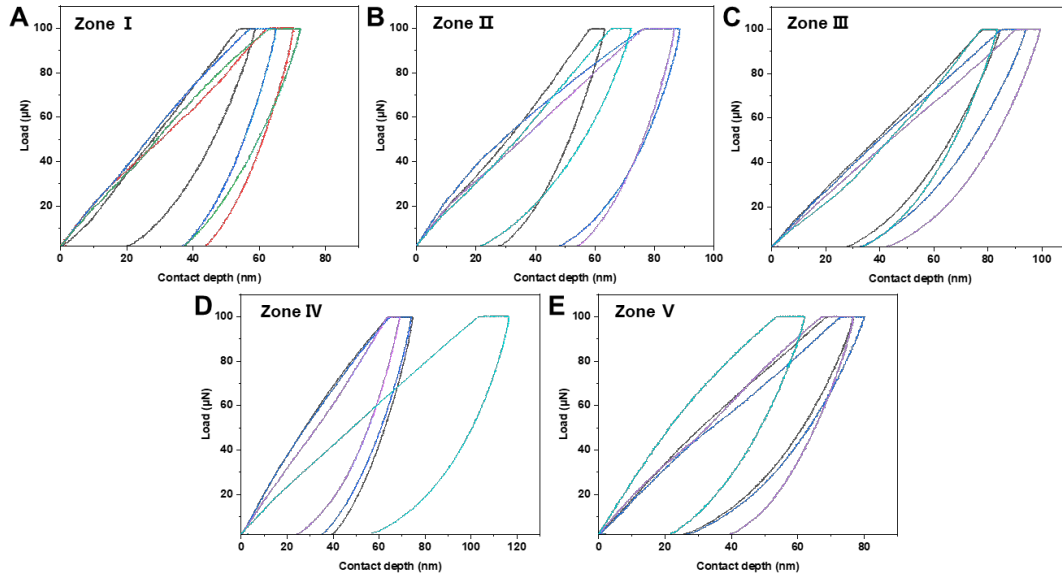

**Figure S2.** Nanoindentation load-depth curves of the mineralized FSB across thickness regions from top (Region I) to bottom (Region V). (A-E) Region I, Region II, Region III, Region IV, and Region V, respectively. The testing area was shown in Figure 5E.

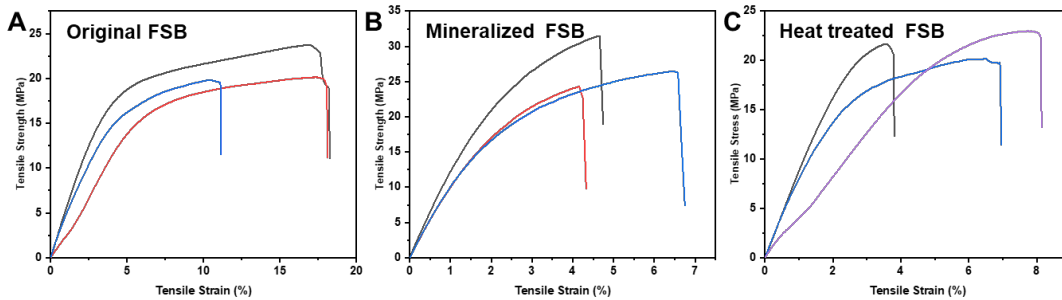

**Figure S3.** Tensile stress-strain curves of the FSB. (A) Original FSB (B) Mineralized FSB (C) Mineralized FSB with heat treatment.

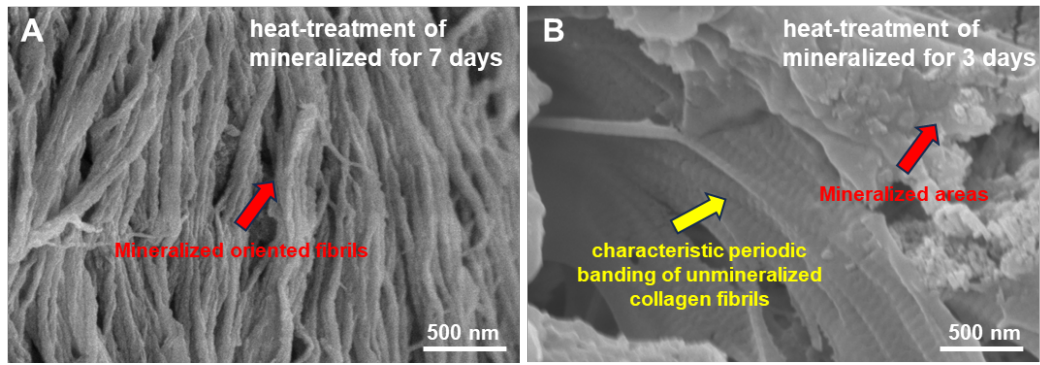

**Figure S4.** Morphology of the fish swim bladder after heat treatment following mineralization for 7 days (A) and 3 days (B). (A) Mineralized fibrils within the fish swim bladder after complete mineralization for 7 days. (B) Fibrils within the fish swim bladder after partial mineralization for 3 days, where the unmineralized collagen fibrils still exhibit the characteristic periodic banding pattern of collagen.

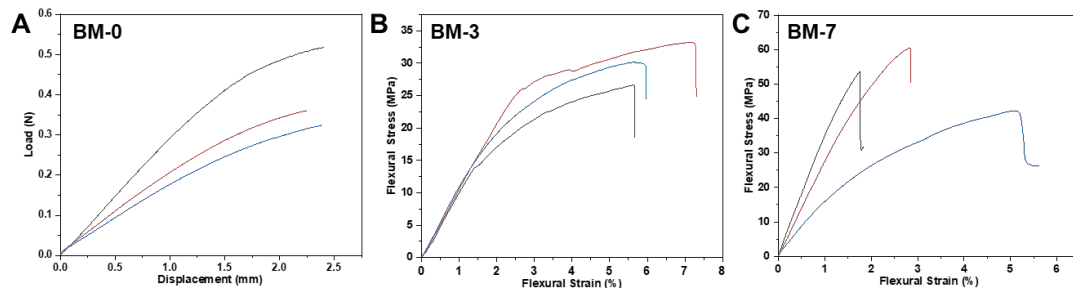

**Figure S5.** Stress-displacement curve and flexural stress-strain curves of the bulk materials. (A) BM-0 (B) BM-3 (C) BM-7.

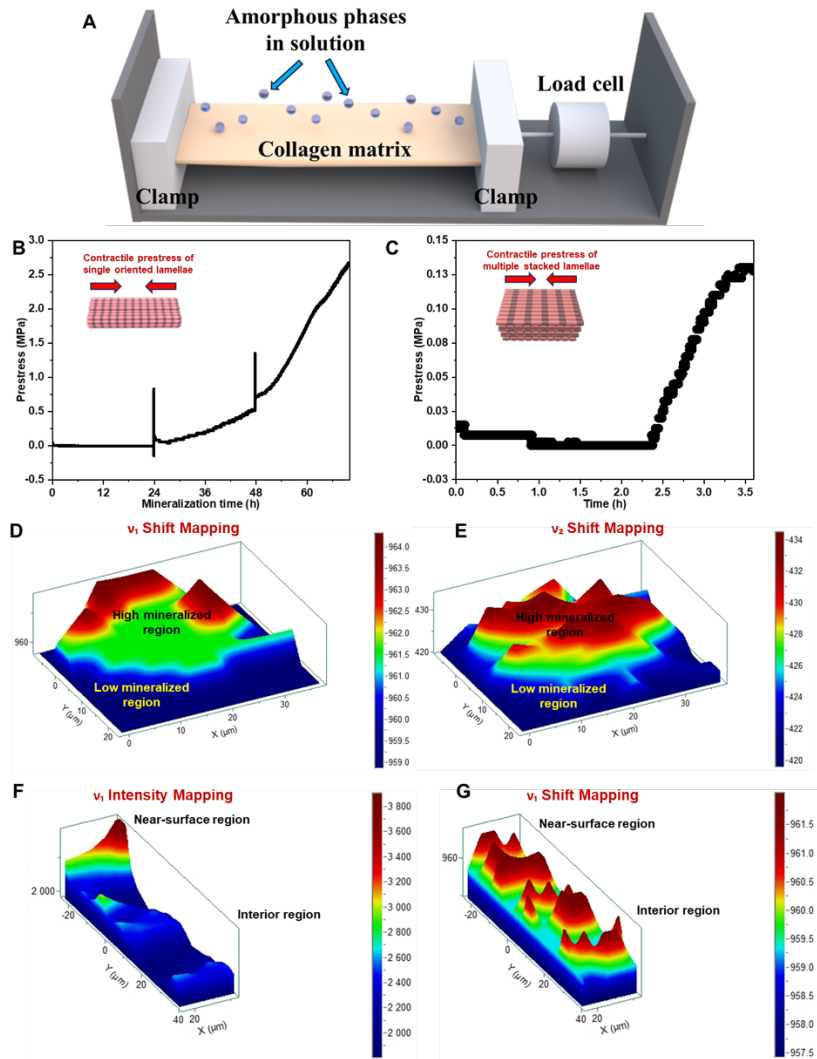

**Figure S6.** In-situ monitoring of prestress during mineralization process. (A) Schematic of the custom-built prestress monitoring setup. (B) Time-dependent evolution of prestress during mineralization of oriented collagen fibrils of tendon. (C) Time-dependent evolution of prestress during mineralization of the FSB, composed of stacked collagen lamellae. (D–E) Raman mapping of the  $\nu_1$  (D) and  $\nu_2$  (E) peaks shifts on the surface mineralized region of the FSB. (F–G) Spatial distribution of HAP intensity mapping (F) and Raman  $\nu_1$  peak shift mapping (G) across a longitudinal section of the FSB.

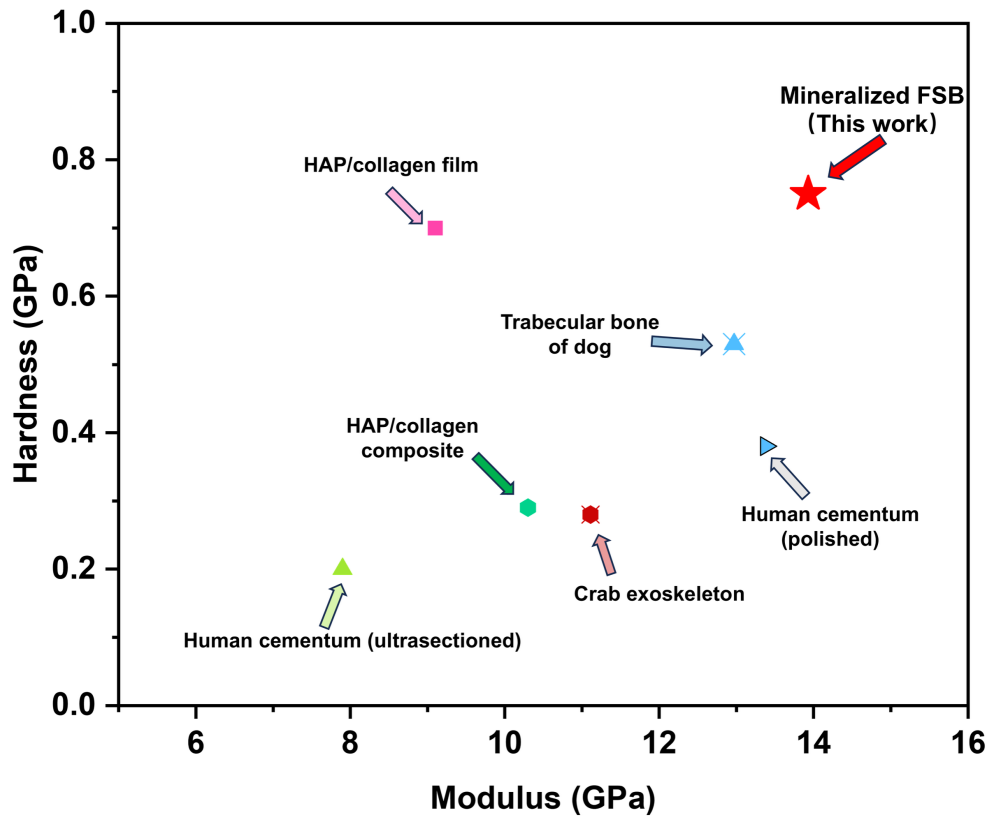

**Figure S7.** Comparison of modulus and hardness among natural or artificial collagen-based composites

**Table S1** Mechanical properties of the reported natural or artificial collagen-based materials using various testing methods

| <b>Mineralized Collagen Materials</b>          | <b>Minerals</b> | <b>Testing methods</b> | <b>Mechanical properties</b>                                                                            | <b>Refs.</b> |
|------------------------------------------------|-----------------|------------------------|---------------------------------------------------------------------------------------------------------|--------------|
| Human trabecular                               | HAP             | Nanoindentation        | E:15.0 ± 2.5 GPa<br>H:0.515 ± 0.082 GPa                                                                 | 1            |
| Trabecular bone of dog                         | HAP             | Nanoindentation        | E:12.97 ± 4.15 GPa<br>H:0.53 ± 0.24 GPa                                                                 | 2            |
| Human cementum (ultrasectioned, wet specimens) | HAP             | Nanoindentation        | E:7.9 ± 1.3 GPa<br>H:0.20 ± 0.04 GPa                                                                    | 3            |
| Human Cementum (polished, wet specimens)       | HAP             | Nanoindentation        | E:13.38 ± 0.91 GPa<br>H:0.38 ± 0.06 GPa                                                                 | 3            |
| Proximal end (L) of Carp rib bone              | HAP             | Nanoindentation        | E:8.25 ± 0.27 GPa                                                                                       | 4            |
| Distal end (T) of Carp rib bone                | HAP             | Nanoindentation        | E:9.64 ± 0.39 GPa                                                                                       | 4            |
| Crab exoskeleton                               | HAP             | Nanoindentation        | E:11.11 ± 3.56 GPa<br>H:0.28 ± 0.16 GPa                                                                 | 5            |
| Healthy mouse bone                             | HAP             | Nanoindentation        | E:13.9 GPa<br>H: 0.28 GPa                                                                               | 6            |
| PILP-recovery bone                             | HAP             | Nanoindentation        | E:14.3 GPa<br>H: 0.37 GPa                                                                               | 6            |
| Collagen-based composite                       | HAP             | Nanoindentation        | E:10.3 ± 2.5 GPa<br>H:0.29 ± 0.07 GPa                                                                   | 7            |
| Collagen films                                 | HAP             | Nanoindentation        | H:0.7 ± 0.1 GPa (dry)<br>E:9.1 ± 1.4 GPa (dry)<br>H: 177 ± 31 kPa (hydrated)<br>E: 8 ± 3 kPa (hydrated) | 8            |
| Collagen scaffolds                             | HAP             | Tensile                | Modulus of 1.0 MPa (dry)                                                                                | 9            |
| Collagen gel                                   | Carbonated HAP  | Tensile                | Strength of 1.4 MPa (dry)<br>Modulus of 4.7 MPa (dry)                                                   | 10           |

|                 |     |                 |                                                                                              |           |
|-----------------|-----|-----------------|----------------------------------------------------------------------------------------------|-----------|
| Mineralized FSB | HAP | Nanoindentation | E: $13.93 \pm 4.02$ GPa<br>H: $0.75 \pm 0.52$ GPa                                            | This work |
| Mineralized FSB | HAP | Tensile         | Ultimate tensile strength<br>$27.4 \pm 3.7$ MPa<br>Elastic modulus<br>$1213.4 \pm 140.1$ MPa | This work |

**Table S2** Mechanical properties of the reported bioinspired collagen/HAP composites using flexural or compression tests.

| <b>Bulk HAP mineralized collagen composites</b> | <b>Component</b>                                    | <b>Testing methods</b> | <b>Mechanical properties</b>                                                       | <b>Refs</b> |
|-------------------------------------------------|-----------------------------------------------------|------------------------|------------------------------------------------------------------------------------|-------------|
| Collagen-calcium phosphate bone cement          | Collagen and Calcium phosphate                      | Flexural Test          | Flexural strength from $13.9 \pm 2.3$ MPa to $9.0 \pm 2.5$ MPa                     | 11          |
| Collagen composite membranes                    | Collagen chitosan and $\beta$ -tricalcium phosphate | Flexural Test          | Flexural strength of 13.6 MPa                                                      | 12          |
| HAP/Collagen composites                         | HAP/collagen                                        | Flexural Test          | Flexural modulus of $2.46 \pm 0.48$ and Flexural strength of $0.651 \pm 0.103$ MPa | 13          |
| Biomimetic Collagen/HAP Composite Scaffolds     | HAP/collagen                                        | Compression Test       | Compressive modulus of about 3 MPa                                                 | 14          |
| BM-3                                            | HAP/collagen                                        | Flexural Test          | Flexural strength $29.93 \pm 3.3$ MPa and Elastic modulus $0.90 \pm 0.19$ GPa      | This work   |
| BM-7                                            | HAP/collagen                                        | Flexural Test          | Flexural strength $51.9 \pm 9.5$ MPa and Elastic modulus $3.0 \pm 1.2$ GPa         | This work   |

## References:

1. J. Y. Rho, M. E. Roy, 2nd, T. Y. Tsui and G. M. Pharr, *J. Biomed. Mater. Res.*, 1999, 45, 48-54.
2. E. Mittra, S. Akella and Y. X. Qin, *J. Biomed. Mater. Res. Part A*, 2006, 79A, 86-93.
3. S. P. Ho, H. Goodis, M. Balooch, G. Nonomura, S. J. Marshall and G. Marshall, *Biomaterials*, 2004, 25, 4847-4857.
4. M. E. Roy, S. K. Nishimoto, J. Y. Rho, S. K. Bhattacharya and G. M. Pharr, *J. Mater. Sci.-Mater. Med.*, 2001, 12, 699-702.
5. T. Inoue, Q. Hai and K. Nakazato, *J. Mater. Res. Technol-JMRT*, 2024, 33, 6.
6. S. S. Yao, X. F. Lin, Y. F. Xu, Y. W. Chen, P. C. Qiu, C. Y. Shao, B. Jin, Z. Mu, N. Sommerdijk and R. K. Tang, *Adv. Sci.*, 2019, 6, 10.
7. A. Stanishevsky, S. Chowdhury, P. Chinoda and V. Thomas, *J. Biomed. Mater. Res. Part A*, 2008, 86A, 873-882.
8. Y. Liu, D. Luo, X. X. Kou, X. D. Wang, F. R. Tay, Y. L. Sha, Y. H. Gan and Y. H. Zhou, *Adv. Funct. Mater.*, 2013, 23, 1404-1411.
9. N. Saxena, M. A. Cremer, E. S. Dolling, H. Nurrohman, S. Habelitz, G. W. Marshall and L. B. Gower, *Dent. Mater.*, 2018, 34, 1378-1390.
10. N. Nassif, F. Gobeaux, J. Seto, E. Belamie, P. Davidson, P. Panine, G. Mosser, P. Fratzl and M. M. G. Guille, *Chem. Mat.*, 2010, 22, 3307-3309.
11. J. L. Moreau, M. D. Weir and H. H. K. Xu, *J. Biomed. Mater. Res. Part A*, 2009, 91A, 605-613.
12. S. B. Lee, J. S. Kwon, Y. K. Lee, K. M. Kim and K. N. Kim, *J. Biomed. Mater. Res. Part B*, 2012, 100B, 1935-1942.
13. S. Yunoki, H. Sugiura, T. Ikoma, E. Kondo, K. Yasuda and J. Tanaka, *Biomed. Mater.*, 2011, 6, 10.
14. J. C. Wang and C. Z. Liu, *J. Bionic Eng.*, 2014, 11, 600-609.
